# Supplementary material for: Multiple Assays on Non-Target Organisms to Determine the Risk of Acute Environmental Toxicity in Tebuconazole-Based Fungicides Widely Used in the Black Sea Coastal Area
Source: MDPI journal article supplement (doi:10.3390/toxics11070597), 2023-07-07
Supplement: s1 [file s1]

Bootstrap calculation of toxicity parameters

11.05.2023 19:11 Daphnia EC50 effect 48h exposure

Data sheet : Daphnia Regtox 48 h

| Concentration | Average effect | Standard deviation | Nb replicates |   |   |   |   |   |
|---------------|----------------|--------------------|---------------|---|---|---|---|---|
| 0             | 0              | 0                  | 4             | 0 | 0 | 0 | 0 | 0 |
| 0,83          | 0,25           | 0,5                | 4             | 0 | 1 | 0 | 0 | 0 |
| 1,49          | 1,25           | 0,5                | 4             | 2 | 1 | 1 | 1 | 1 |
| 2,66          | 3              | 0                  | 4             | 3 | 3 | 3 | 3 | 3 |
| 4,66          | 4,25           | 0,5                | 4             | 4 | 4 | 4 | 4 | 5 |
| 8,33          | 5              | 0                  | 4             | 5 | 5 | 5 | 5 | 5 |

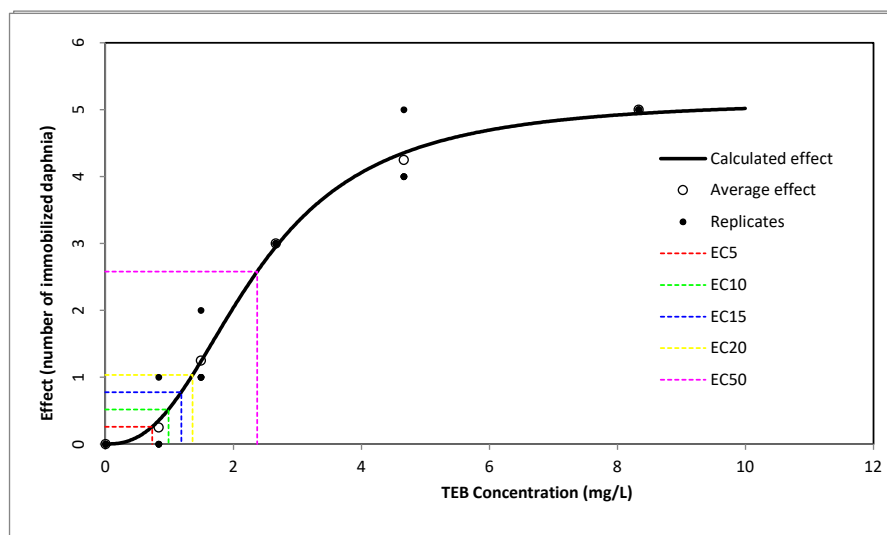

| Calc. Parameters                     | Parameters values |             |             | Confidence intervals |             | 500 Set of simulated Ys, replicates |             |
|--------------------------------------|-------------------|-------------|-------------|----------------------|-------------|-------------------------------------|-------------|
| HILL                                 | Optimal           | Average     | Median      | < alpha =5           | > alpha =5  | < alpha =1                          | > alpha =1  |
| 0 No object : non adjusted parameter |                   |             |             |                      |             |                                     |             |
|                                      | 2,502947519       | 2,504007362 | 2,502947569 | 1,819105864          | 3,022921085 | 1,616360247                         | 3,197910309 |
|                                      | 2,370349588       | 2,386764714 | 2,376816988 | 2,266146183          | 2,521183968 | 2,200393558                         | 2,730052471 |
|                                      | 5,153528455       | 5,171792055 | 5,153528214 | 4,967662334          | 5,48139596  | 4,967662334                         | 5,766492367 |
| EC5                                  | 0,730993166       | 0,729466136 | 0,730993152 | 0,511837989          | 0,897031665 | 0,440301031                         | 0,941230357 |
| EC10                                 | 0,985291857       | 0,983267539 | 0,985291839 | 0,780392498          | 1,148828506 | 0,700545162                         | 1,188972831 |
| EC15                                 | 1,185321585       | 1,183789867 | 1,185321569 | 0,98646912           | 1,338995814 | 0,922812402                         | 1,374038219 |
| EC20                                 | 1,362297641       | 1,361843916 | 1,362297654 | 1,174956799          | 1,502674103 | 1,118208289                         | 1,53214848  |
| EC50                                 | 2,370349588       | 2,386764714 | 2,376816988 | 2,266146183          | 2,521183968 | 2,200393558                         | 2,730052471 |
