# Supplementary material for: Multiple Assays on Non-Target Organisms to Determine the Risk of Acute Environmental Toxicity in Tebuconazole-Based Fungicides Widely Used in the Black Sea Coastal Area
Source: MDPI journal article supplement (doi:10.3390/toxics11070597), 2023-07-07
Supplement: s1 [file s1]

Bootstrap calculation of toxicity parameters

11.05.2023 15:32

Data sheet : Spirodela Regtox

| Concentration | Average effect | Standard deviation | Nb replicates |        |        |        |        |        |        |        |        |
|---------------|----------------|--------------------|---------------|--------|--------|--------|--------|--------|--------|--------|--------|
| 0             | 11,5905        | 4,290565198        | 8             | 14,047 | 16,453 | 4,011  | 14,954 | 10,827 | 13,084 | 6,491  | 12,857 |
| 0,39          | 9,774          | 3,533733032        | 8             | 10,057 | 5,06   | 16,272 | 6,081  | 11,539 | 8,835  | 11,744 | 8,604  |
| 0,781         | 9,03025        | 3,989371048        | 8             | 15,787 | 2,15   | 9,487  | 7,351  | 8,187  | 7,315  | 9,549  | 12,416 |
| 1,562         | 8,247625       | 4,8693659          | 8             | 14,29  | 8,873  | 2,628  | 3,056  | 5,395  | 12,422 | 14,186 | 5,131  |
| 3,125         | 2,228125       | 1,61848884         | 8             | 1,245  | 1,792  | 0,696  | 3,036  | 0,107  | 5      | 3,639  | 2,31   |
| 6,25          | 0,96775        | 0,884383522        | 8             | 2,58   | 0,714  | 0,133  | 0,55   | 0,185  | 0,475  | 2      | 1,105  |

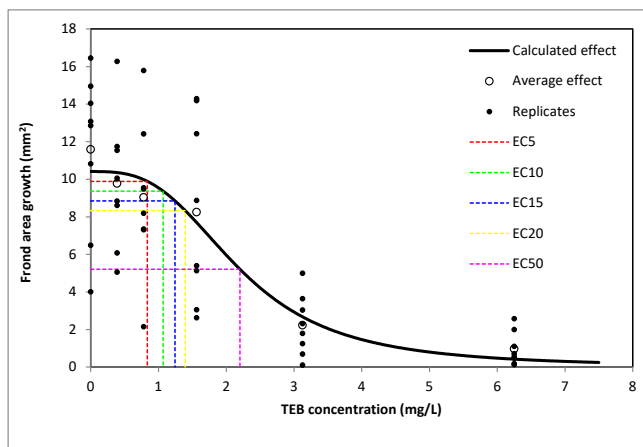

| Calc. Parameters | Parameters values                    |             |             | Confidence intervals |             | 500 Set of simulated Ys, replicates |             |
|------------------|--------------------------------------|-------------|-------------|----------------------|-------------|-------------------------------------|-------------|
| HILL             | Optimal                              | Average     | Median      | < alpha =5           | > alpha =5  | < alpha =1                          | > alpha =1  |
| Control          | 10,41010258                          | 10,92598169 | 10,77590656 | 8,972294331          | 13,6716671  | 8,456084251                         | 14,1005373  |
| Hill number      | 3,035215132                          | 4,704181911 | 2,785853148 | 1,042898834          | 19,37869072 | 0,901856303                         | 21,10332203 |
| EC50             | 2,203653411                          | 2,043036499 | 2,068352699 | 1,030846894          | 2,946077585 | 0,790752381                         | 2,98356843  |
| Maximum effect   | 0 No object : non adjusted parameter |             |             |                      |             |                                     |             |
| EC5              | 0,835290489                          | 0,904797242 | 0,710850954 | 0,070255131          | 2,503999114 | 0,039089581                         | 2,571987391 |
| EC10             | 1,068446763                          | 1,077408187 | 0,936161339 | 0,140314221          | 2,610549808 | 0,086428419                         | 2,662812114 |
| EC15             | 1,24436414                           | 1,21194613  | 1,108632922 | 0,212706208          | 2,674214363 | 0,139664613                         | 2,720815063 |
| EC20             | 1,395677349                          | 1,331400085 | 1,268330574 | 0,293511704          | 2,727120161 | 0,196252652                         | 2,766692042 |
| EC50             | 2,203653411                          | 2,043036499 | 2,068352699 | 1,030846894          | 2,946077585 | 0,790752381                         | 2,98356843  |
