# Supplementary material for: Multiple Assays on Non-Target Organisms to Determine the Risk of Acute Environmental Toxicity in Tebuconazole-Based Fungicides Widely Used in the Black Sea Coastal Area
Source: MDPI journal article supplement (doi:10.3390/toxics11070597), 2023-07-07
Supplement: s1 [file s1]

Bootstrap calculation of toxicity parameters  
 11.05.2023 19:59 Thamno TEB exposure 24 h  
 Data sheet : Thamno Regtox

| Concentration | Average effect | Standard deviation | Nb replicates |    |    |    |    |
|---------------|----------------|--------------------|---------------|----|----|----|----|
| 0             | 0              | 0                  | 3             | 0  | 0  | 0  | 0  |
| 0,03          | 0,666666667    | 0,577350269        | 3             | 1  | 1  | 0  | 0  |
| 0,1           | 3,333333333    | 0,577350269        | 3             | 3  | 3  | 4  | 4  |
| 0,18          | 9              | 0                  | 3             | 9  | 9  | 9  | 9  |
| 0,32          | 10             | 0                  | 3             | 10 | 10 | 10 | 10 |
| 1             | 10             | 0                  | 3             | 10 | 10 | 10 | 10 |

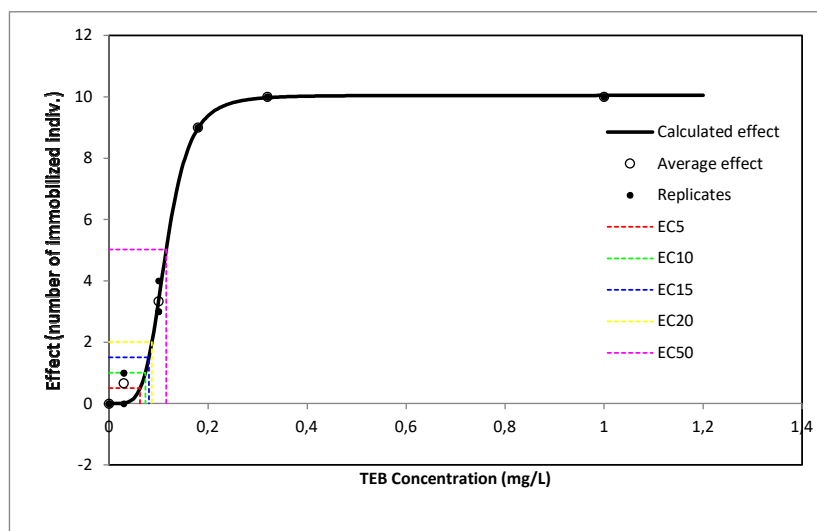

| Calc. Parameters | Parameters values                   |             |             | Confidence intervals |             | 500 Set of simulated Ys, replicates |             |
|------------------|-------------------------------------|-------------|-------------|----------------------|-------------|-------------------------------------|-------------|
| HILL             | Optimal                             | Average     | Median      | < alpha =5           | > alpha =5  | < alpha =1                          | > alpha =1  |
| Control          | 0 No object : non ajusted parameter |             |             |                      |             |                                     |             |
| Hill number      | 4,817441048                         | 4,812290209 | 4,817445755 | 4,233829498          | 5,127745152 | 4,135730267                         | 5,148203373 |
| EC50             | 0,115493338                         | 0,115415424 | 0,115493305 | 0,110020727          | 0,118115485 | 0,109943286                         | 0,118115485 |
| Maximum effect   | 10,04267707                         | 10,04382865 | 10,04267502 | 10,03081894          | 10,0694437  | 10,02762032                         | 10,08755493 |
| EC5              | 0,062677899                         | 0,062564443 | 0,06267792  | 0,054883543          | 0,06646885  | 0,054021135                         | 0,066597596 |
| EC10             | 0,073194112                         | 0,073076273 | 0,073194124 | 0,065477081          | 0,07689596  | 0,064718574                         | 0,077000298 |
| EC15             | 0,080571578                         | 0,080454254 | 0,080571584 | 0,073037177          | 0,084156066 | 0,072378442                         | 0,084240049 |
| EC20             | 0,086612759                         | 0,086497975 | 0,086612761 | 0,079299837          | 0,090071052 | 0,078738116                         | 0,09013661  |
| EC50             | 0,115493338                         | 0,115415424 | 0,115493305 | 0,110020727          | 0,118115485 | 0,109943286                         | 0,118115485 |
